# Supplementary material
Source: PubMed Central journal article supplement (PMC4136117)
Supplement: AEM.01502-14_zam999105584so1.pdf [file AEM.01502-14_zam999105584so1.pdf]

## 1 SUPPLEMENTAL MATERIAL

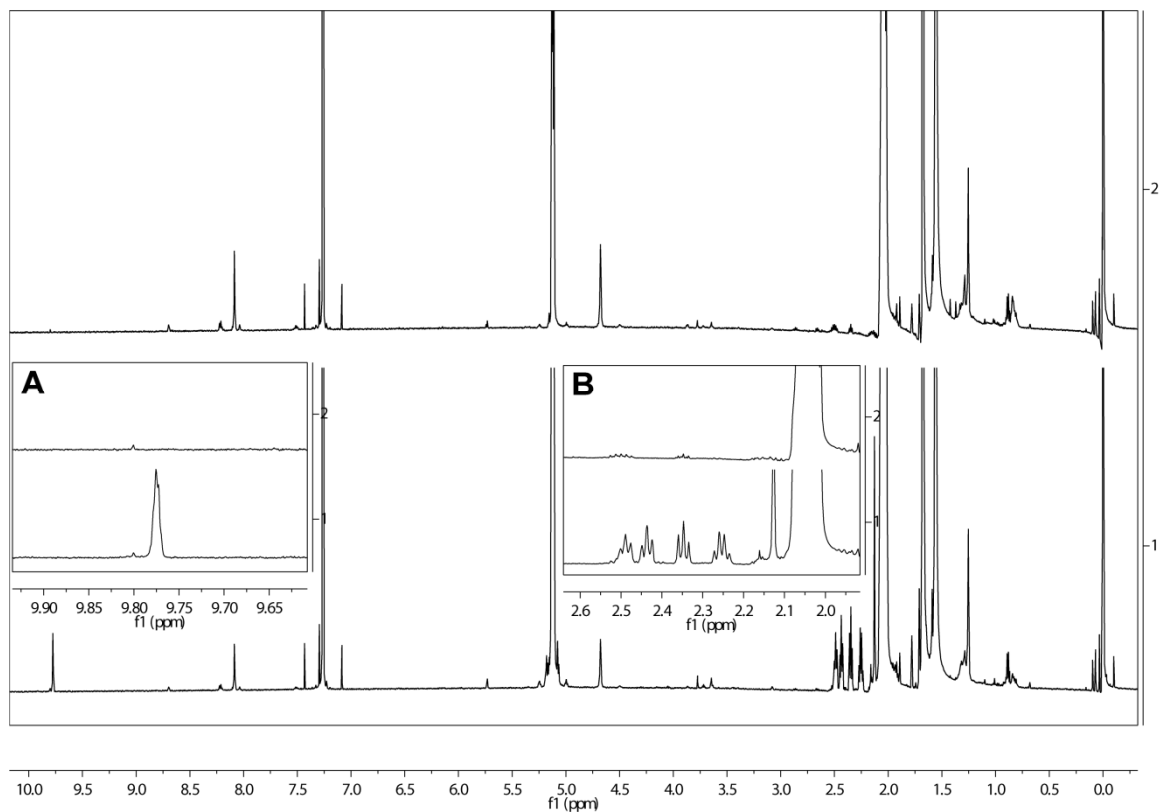

2

3 FIG. S1. Complete  $^1\text{H-NMR}$  spectrum of the second fraction of Lcp1<sub>VH2</sub>-mediated rubber  
4 cleavage products (1) in comparison with the spectrum of the negative control (2; latex  
5 fraction treated with heat inactivated Lcp1<sub>VH2</sub>). Differences between the spectra are  
6 highlighted in boxes A (9.65 ppm – 9.90 ppm) and B (2.0 ppm – 2.6 ppm).

7

8 Table S1. Calculation of the average chain length:

9 **Fraction 1:**

10 a)  $I(4\text{-Me} + 8\text{-Me}) / 3 \quad \Rightarrow 53.3 / 3 = 17.8$

11 b)  $I(6 + 7) + I(3) + I(10) / 4 \quad \Rightarrow 67.6 + 2.1 + 1.9 / 4 = 17.9$

12 c)  $I(5) + I(9) / 1 \quad \Rightarrow 17.0 + 1.1 / 1 = 18.1$

13 Giving an average of  $n = 17.9$

14 **Fraction 2:**

15 d)  $I(4\text{-Me} + 8\text{-Me}) / 3 \quad \Rightarrow 29.7 / 3 = 9.9$

16 e)  $I(6 + 7) + I(3) + I(10) / 4 \quad \Rightarrow 35.4 + 2.3 + 2.0 / 4 = 9.9$

17 f)  $I(5) + I(9) / 1 \quad \Rightarrow 9.0 + 1.1 / 1 = 10.1$

18 Giving an average of  $n = 10.0$
